# Supplementary material
Source: ML conference proceedings conference paper supplement (https://openreview.net/forum?id=Ms6QZafNv01)
Supplement: supplementary_material [file attachment]

---

# Optimal algorithms for group distributionally robust optimization and beyond

---

Anonymous Author(s)

Affiliation

Address

email

## Abstract

1        Distributionally robust optimization (DRO) can improve the robustness and fairness  
2        of learning methods. In this paper, we devise stochastic algorithms for a class  
3        of DRO problems including group DRO, subpopulation fairness, and empirical  
4        conditional value at risk (CVaR) optimization. Our new algorithms achieve faster  
5        convergence rates than existing algorithms for multiple DRO settings. We also  
6        provide a new information-theoretic lower bound that implies our bounds are tight  
7        for group DRO. Empirically, too, our algorithms outperform known methods.

## 8    1 Introduction

9        Commonly, machine learning models are trained to optimize the average performance. However,  
10       such models may not perform equally well among all demographic subgroups due to a hidden bias in  
11       the training set or distribution shift in training and test phases [Hovy and Søgaard, 2015; Hashimoto  
12       *et al.*, 2018; Martinez *et al.*, 2021; Duchi and Namkoong, 2021]. Biases in datasets are also directly  
13       related to fairness concerns in machine learning [Buolamwini and Gebru, 2018; Jurgens *et al.*, 2017].

14       Recently, various algorithms based on distributionally robust optimization (DRO) have been proposed  
15       to address these problems [Hovy and Søgaard, 2015; Hashimoto *et al.*, 2018; Hu *et al.*, 2018; Oren *et al.*,  
16       2019; Williamson and Menon, 2019; Sagawa *et al.*, 2020; Curi *et al.*, 2020; Zhang *et al.*, 2021;  
17       Martinez *et al.*, 2021; Duchi and Namkoong, 2021]. However, these algorithms are often highly  
18       tailored to each specific DRO formulation. Furthermore, it is often unclear whether these proposed  
19       algorithms are optimal in terms of the convergence rate. Are there a unified algorithmic methodology  
20       and a lower bound for these problems?

21       **Contributions.** In this paper, we study a general class of DRO problems, which includes group  
22       DRO [Hu *et al.*, 2018; Oren *et al.*, 2019; Sagawa *et al.*, 2020], subpopulation fairness [Martinez *et al.*,  
23       2021], conditional value at risk (CVaR) optimization [Curi *et al.*, 2020], and many others. Let  
24        $\Theta \subseteq \mathbb{R}^n$  be a convex set of model parameters and  $\ell(\theta; z) : \Theta \rightarrow \mathbb{R}_+$  be a convex loss of the model  
25       with parameter  $\theta$  with respect to data point  $z$ . The data point  $z$  may be drawn from one out of  $m$   
26       distributions  $P_1, \dots, P_m$  which are accessible via a stochastic oracle that returns an i.i.d. sample  
27        $z \sim P_i$ . Let  $Q$  be a convex subset of the probability simplex in  $\mathbb{R}^m$  that contains the uniform vector,  
28       i.e.,  $(1/m, \dots, 1/m) \in Q$ . Our DRO formulation is as follows:

$$\min_{\theta \in \Theta} \max_{q \in Q} \sum_{i=1}^m q_i \mathbf{E}_{z \sim P_i} [\ell(\theta; z)]. \quad (1)$$

29       If  $Q$  are the probability simplex and scaled  $k$ -set polytope, we can recover group DRO [Sagawa *et al.*,  
30       2020] and subpopulation fairness [Martinez *et al.*, 2021], respectively. Moreover, we formulate  
31       a new, more general fairness concept based on weighted rankings with  $Q$  being a permutahedron,  
32       which includes these special cases; see Section 2 for details.

Table 1: Summary of convergence results for group DRO. Here,  $m$  denotes the number of groups,  $n$  the dimension of  $\theta$ ,  $G$  the Lipschitz constant of loss function  $\ell$ ,  $D$  the diameter of feasible set  $\Theta$ ,  $M$  the range of loss function  $\ell$ , and  $T$  the number of calls to stochastic oracle.

| reference                     | convergence rate $\mathbf{E}[\varepsilon_T]$            | iteration complexity                                                | lower bound                                                                 |
|-------------------------------|---------------------------------------------------------|---------------------------------------------------------------------|-----------------------------------------------------------------------------|
| [Sagawa <i>et al.</i> , 2020] | $O\left(m\sqrt{\frac{G^2 D^2 + M^2 \log m}{T}}\right)$  | $O(m + n) + \text{proj. onto } \Theta$                              |                                                                             |
| <b>Ours (Theorem 2)</b>       | $O\left(\sqrt{\frac{G^2 D^2 + M^2 m \log m}{T}}\right)$ | $O(m + n) + \text{proj. onto } \Theta$                              | $\Omega\left(\sqrt{\frac{G^2 D^2 + M^2 m}{T}}\right)$<br><b>(Theorem 5)</b> |
| <b>Ours (Theorem 3)</b>       | $O\left(\sqrt{\frac{G^2 D^2 + M^2 m}{T}}\right)$        | $O(m + n) + \text{proj. onto } \Theta$<br>+ solving scalar equation |                                                                             |

For our general DRO, we devise an efficient stochastic gradient algorithm. Furthermore, we show that it achieves the information-theoretic optimal convergence rate for group DRO. Our main technical contributions are as follows;

- We provide a generic stochastic gradient algorithm for our general DRO. By specializing it in the group DRO setting, we provide two algorithms (GDRO-EXP3 and GDRO-TINF) that improve the rate of Sagawa *et al.* [2020] by a factor of  $\Omega(\sqrt{m})$  with the almost same complexity per iteration; see Table 1. Furthermore, our generic algorithm can be specialized to improve the convergence rate of Curi *et al.* [2020] for subpopulation fairness (a.k.a. empirical CVaR optimization). Finally, we show that our algorithm runs efficiently if  $Q$  is a permutahedron, which includes all aforementioned subclasses.
- We prove a matching information-theoretic lower bound for the convergence rate of group DRO. This implies that no algorithm can improve the convergence rate of GDRO-TINF (up to a constant factor). To the best of our knowledge, this is the first information-theoretic lower bound for group DRO.
- Our experiments on real-world and synthetic datasets show that our algorithms also empirically outperform the known algorithm, supporting our theoretical analysis.

## 1.1 Our techniques

**Algorithms.** The core idea of our algorithms is *stochastic no-regret dynamics* [Hazan, 2016]. We regard DRO (1) as a two-player zero-sum game between a player who picks  $\theta \in \Theta$  and another player who picks  $q \in Q$ . The two players iteratively update their solution using online learning algorithms; in particular, we will use online gradient descent (OGD) [Zinkevich, 2003] and online mirror descent (OMD) [Cesa-Bianchi and Lugosi, 2006] for the  $\theta$ -player and  $q$ -player, respectively. In addition, we need to estimate gradients for both players, since the objective function of our DRO is stochastic and we cannot obtain exact gradients.

The convergence rate of stochastic no-regret dynamics depends on the expected regret of OGD and OMD. To obtain the optimal convergence rate, we must carefully choose the regularizer in OMD as well as gradient estimators, exploiting the structure of our DRO. In particular, we need to balance the variance of gradient estimators and the diameter terms in *both* OGD and OMD. This is the most challenging part of the algorithm design. Inspired by adversarial multi-armed bandit algorithms, we design gradient estimators for no-regret dynamics of OGD and OMD in our DRO. Indeed, our algorithms for group DRO (GDRO-EXP3 and GDRO-TINF) are based on adversarial multi-armed bandit algorithms, EXP3 [Auer *et al.*, 2003] and Tsallis-INF [Zimmert and Seldin, 2021], respectively, hence the name. Although each building block (OGD, OMD, and gradient estimators) is fairly known in the literature, we need to put them together in the right combination to obtain the optimal rate.

**Lower bound.** For the lower bound, we carefully design a family of group DRO instances for which any algorithm requires a certain number of queries to achieve a good objective value. To bound the number of queries, we use information-theoretic tools such as Le Cam’s lemma and bound the Kullback-Leibler divergence between Bernoulli distributions. Such tools are also used at the heart of lower bounds for stochastic convex optimization [Agarwal *et al.*, 2012] and adversarial multi-armed bandits [Auer *et al.*, 2003], but the connection to those settings is much more subtle here, and our construction is specifically designed for group DRO-type problems.

## 1.2 Related work

DRO is a wide field ranging from robust optimization to machine learning and statistics [Goh and Sim, 2010; Bertsimas *et al.*, 2018], whose original idea dates back to Scarf [1958]. Popular choices of the uncertainty set in DRO include balls around an empirical distribution in Wasserstein distance [Esfahani and Kuhn, 2018; Blanchet *et al.*, 2019],  $f$ -divergence [Namkoong and Duchi, 2016; Duchi and Namkoong, 2021],  $\chi^2$ -divergence [Staib *et al.*, 2019], and maximum mean discrepancy [Staib and Jegelka, 2019; Kirschner *et al.*, 2020].

DRO algorithms have been mainly studied for the offline setting, i.e., algorithms can access all data points of the empirical distribution. Note that our DRO is not offline because the group distributions are given by the stochastic oracles. Namkoong and Duchi [2016] proposed stochastic gradient algorithms for offline DRO with  $f$ -divergence uncertainty sets. Curi *et al.* [2020] used no-regret dynamics for empirical CVaR minimization. Their algorithm invokes sampling from  $k$ -DPP in each iteration, which is more computationally demanding than our algorithm. Furthermore, our algorithm gets rid of an  $O(\log m)$  factor in the convergence rate using the Tsallis entropy regularizer; see Theorem 4. Qi *et al.* [2021]; Jin *et al.* [2021] devised stochastic gradient algorithms for several DRO with non-convex losses.

Agarwal *et al.* [2012] gave a lower bound for stochastic convex optimization, which is a special case of our DRO with only one distribution. Recently, Carmon *et al.* [2021] showed a lower bound for minimax problem  $\min_x \max_{i=1}^m f_i(x)$  for non-stochastic Lipschitz convex  $f_i$ . Our lower bound deals with the stochastic functions, so this result does not apply.

In this paper, we assume that the group information is given in advance. However, the group information might not be easy to define in practice. Bao *et al.* [2021] propose a simple method to define groups for classification problems based on mistakes of models in the training phase. Their method often generates group DRO instances with large  $m$ . Our algorithms are more efficient for such group DRO thanks to the better dependence on  $m$  in the convergence rate.

No-regret dynamics is a well-studied method for solving two-player zero-sum games [Cesa-Bianchi and Lugosi, 2006]. For non-stochastic convex-concave games, one can achieve  $O(1/T)$  convergence via predictable sequences [Rakhlin and Sridharan, 2013]. This result does not apply to our setting because our DRO is a stochastic game.

**Notations.** Throughout the paper,  $m$  denotes the number of distributions (groups) and  $n$  denotes the dimension of a variable  $\theta$ . For a positive integer  $m$ , we write  $[m] := \{1, \dots, m\}$ . The orthogonal projection onto set  $\Theta$  is denoted by  $\text{proj}_\Theta$ . The  $i$ th standard unit vector is denoted by  $\mathbf{e}_i$  and the all-one vector is denoted by  $\mathbf{1}$ . The probability simplex in  $\mathbb{R}^m$  is denoted by  $\Delta_m$ .

## 2 Examples contained in our general DRO

In this section, we show how several DRO formulations in the literature can be phrased in our general DRO formulation (1). In addition, we propose a novel fairness constraint based on weighted rankings using our general DRO.

**Group DRO.** When  $Q$  equals the probability simplex, we obtain group DRO [Hu *et al.*, 2018; Oren *et al.*, 2019; Sagawa *et al.*, 2020]:

$$\min_{\theta \in \Theta} \max_{i=1}^m \mathbf{E}_{z \sim P_i} [\ell(\theta; z)]. \quad (2)$$

That is, group DRO aims to minimize the expected loss in the worst group, thereby ensuring better performance across all groups.

**Empirical CVaR, Subpopulation fairness, Average top- $k$  worst group loss.** Group DRO may yield overly pessimistic solutions. For instance, the groups might be automatically generated by other algorithms (such as one in Bao *et al.* [2021]) and there might exist a few “outlier” groups that make the group DRO objective trivial.

For such a case, we can restrict  $Q$  to a small subset of the probability simplex so that the solution cannot put large weights on a few outlier groups. Especially, let  $Q = \left\{ q \in \Delta_m : 0 \leq q_i \leq \frac{1}{pm} \right\}$  for

some parameter  $p \in (0, 1)$ , i.e.,  $Q$  is a scaled  $k$ -set polytope. The intuition behind the choice of  $Q$  is that, by limiting the largest entry of  $q$  to  $1/pm$ , DRO would optimize the expected loss over the worst  $p$ -fraction subgroups of  $m$  groups. Therefore, if the fraction of outlier groups is sufficiently small compared to  $p$ , then  $p$ -fraction subgroups must contain “inlier” groups as well. Therefore, it is likely that DRO with  $Q$  finds solutions more robust than group DRO.

When  $P_i$  is the Dirac measure of data  $z_i$ , then the resulting DRO is empirical CVaR optimization [Curi *et al.*, 2020]. In the fairness context, the same problem is called subpopulation fairness [Williamson and Menon, 2019; Martinez *et al.*, 2021; Duchi and Namkoong, 2021].

If  $p = m/k$  for some positive integer  $k$ , the resulting DRO is the average top- $k$  worst group loss [Zhang *et al.*, 2021]:

$$\min_{\theta \in \Theta} \frac{1}{k} \sum_{i=1}^k L_i^\downarrow(\theta),$$

where  $L_i^\downarrow(\theta)$  denotes the  $i$ th largest population group loss of  $\theta$ . More precisely, let  $L_i(\theta) = \mathbf{E}_{z \sim P_i}[\ell(\theta; z)]$  for  $i \in [m]$  and sort them in the non-increasing order:  $L_1^\downarrow(\theta) \geq \dots \geq L_m^\downarrow(\theta)$ .

**Weighted ranking of group losses.** The aforementioned DRO formulations are special cases of the following DRO, which we call the *weighted ranking of group losses*. Let  $\alpha \in \Delta^m$  be a fixed vector with non-increasing entries. Let  $Q$  be the permutahedron of  $\alpha$ , the convex hull of  $(\alpha_{\sigma(1)}, \dots, \alpha_{\sigma(m)})$  for all permutations  $\sigma$  of  $[m]$ . Then, the resulting DRO is

$$\min_{\theta \in \Theta} \sum_{i=1}^m \alpha_i L_i^\downarrow(\theta).$$

Group DRO corresponds to  $\alpha = (1, 0, \dots, 0)$  and the average top- $k$  worst group losses corresponds to  $\alpha = (\underbrace{1/k, \dots, 1/k}_{k \text{ times}}, 0, \dots, 0)$ . Another example that is contained in none of the above examples is

*lexicographic minimax fairness* [Diana *et al.*, 2021]. The goal of lexicographical minimax fairness is to find  $\theta \in \Theta$  such that the sequence  $(L_1^\downarrow(\theta), \dots, L_m^\downarrow(\theta))$  is lexicographically minimum. This corresponds to  $\alpha$  with sufficiently varied entries, i.e.,  $\alpha_1 \gg \alpha_2 \gg \dots \gg \alpha_m$ .

### 3 Algorithms

In this section, we describe our algorithms. First, we present a generic algorithm for our general DRO (1) and provide a unified convergence analysis in Section 3.1. Then, we specialize it into two concrete algorithms for group DRO (2) in Section 3.2. We sketch algorithms for the average of top- $k$  group losses and weighted ranking of group loss in Section 3.3.

#### 3.1 Algorithm for the general case

We present our algorithm for general DRO (1). At a high level, our algorithm can be regarded as stochastic no-regret dynamics. Let us denote  $L(\theta, q) := \sum_{i=1}^m q_i \mathbf{E}_{z \sim P_i}[\ell(\theta; z)]$ . Imagine that the  $\theta$ -player and  $q$ -player run online algorithms  $\mathcal{A}_\theta$  and  $\mathcal{A}_q$ , respectively, to solve the minimax problem  $\min_{\theta \in \Theta} \max_{q \in Q} L(\theta, q)$ . That is, for  $t = 1, \dots, T$ ,

- $\theta_t \in \Theta$  and  $q_t \in Q$  are determined by  $\mathcal{A}_\theta$  and  $\mathcal{A}_q$ , respectively.
- Both players feed gradient estimators  $\hat{\nabla}_{\theta,t}$  and  $\hat{\nabla}_{q,t}$  to  $\mathcal{A}_\theta$  and  $\mathcal{A}_q$ , respectively. Here,  $\mathbf{E}[\hat{\nabla}_{\theta,t}] = \nabla_\theta L(\theta_t, q_t)$  and  $\mathbf{E}[\hat{\nabla}_{q,t}] = \nabla_q L(\theta_t, q_t)$ .

Let

$$\varepsilon_T := \max_{q \in Q} L(\bar{\theta}_{1:T}, q) - \min_{\theta \in \Theta} \max_{q \in Q} L(\theta, q)$$

be the optimality gap of the averaged iterate  $\bar{\theta}_{1:T} = \frac{1}{T} \sum_{t=1}^T \theta_t$ . We can bound the expected convergence rate  $\mathbf{E}[\varepsilon_T]$  via regrets  $R_\theta$  and  $R_q$  of these online algorithms (see Appendix A for a formal definition), i.e.,

$$\mathbf{E}[\varepsilon_T] \leq \frac{\mathbf{E}[R_\theta(T)] + \mathbf{E}[R_q(T)]}{T}. \quad (3)$$

159 We can obtain hence the convergence rate of the above algorithms by investigating the expected regret  
160 bounds of these online algorithms.

161 To get a concrete algorithm, we must specify the online algorithms  $\mathcal{A}_\theta, \mathcal{A}_q$  as well as the gradient  
162 estimators  $\hat{\nabla}_{\theta,t}, \hat{\nabla}_{q,t}$ . We use OGD and OMD as  $\mathcal{A}_\theta$  and  $\mathcal{A}_q$ , respectively. We construct the gradient  
163 estimators by sampling  $i_t \sim q_t$  and  $z \sim P_{i_t}$  and setting  $\hat{\nabla}_{\theta,t} = \nabla_\theta \ell(\theta_t; z)$  and  $\hat{\nabla}_{q,t} = \frac{\ell(\theta_t; z)}{q_{t,i_t}} \mathbf{e}_{i_t}$ .  
164 This leads to Algorithm 1. There,  $\Psi : Q \rightarrow \mathbb{R}$  denotes the regularizer of OMD and  $\eta_{\theta,t}$  and  $\eta_q$   
165 denote the step sizes of OGD and OMD, respectively.<sup>1</sup> It turns out that this combination of online  
166 algorithms and gradient estimators yields the best convergence rate (for group DRO) because the  
167 expected regrets of both players are optimal.

---

**Algorithm 1** Algorithm for general DRO (1)

---

**Require:** initial solution  $\theta_1 \in \Theta$ , number of iterations  $T$ , step sizes  $\eta_{\theta,t} > 0$  ( $t \in [T]$ ),  $\eta_q > 0$ , and  
a strictly convex function  $\Psi : Q \rightarrow \mathbb{R}$ .  
1: Let  $q_1 = (1/m, \dots, 1/m)$ .  
2: **for**  $t = 1, \dots, T$  **do**  
3:   Sample  $i_t \sim q_t$ .  
4:   Call the stochastic oracle to obtain  $z \sim P_{i_t}$ .  
5:    $\theta_{t+1} \leftarrow \text{proj}_\Theta(\theta_t - \eta_{\theta,t} \nabla_\theta \ell(\theta_t; z))$   
6:    $\nabla \Psi(\tilde{q}_{t+1}) \leftarrow \nabla \Psi(q_t) - \frac{\eta_q}{q_{t,i_t}} \ell(\theta_t; z) \mathbf{e}_{i_t}$ ;  $q_{t+1} \leftarrow \text{argmin}_{q \in Q} D_\Psi(q, \tilde{q}_{t+1})$ , where  
     $D_\Psi(x, y) = \Psi(x) - \Psi(y) - \nabla \Psi(y)^\top (x - y)$  is the Bregman divergence with respect to  $\Psi$ .  
7: **return**  $\frac{1}{T} \sum_{t=1}^T \theta_t$ .

---

168 We now analyze the convergence rate of Algorithm 1. We make the following standard assumptions.

169 **Assumption 1.** The loss function  $\ell(\theta; z)$  is continuously differentiable and  $G$ -Lipchitz in  $\theta$ , and has  
170 range  $[0, M]$  for all  $z$ . The Euclidean diameter of the feasible region  $\Theta$  is at most  $D$ .

171 The following theorem follows from plugging regret bounds of OGD and OGD, and the construction  
172 of the gradient estimators into (3).

173 **Theorem 1.** If  $\eta_{\theta,t}$  is nonincreasing, Algorithm 1 achieves the expected convergence rate

$$\mathbf{E}[\varepsilon_T] \leq \frac{1}{T} \left( \frac{G^2}{2} \sum_{t=1}^T \eta_{\theta,t} + \frac{D^2}{2\eta_{\theta,T}} + \frac{M^2}{2} \eta_q \sum_{t=1}^T \mathbf{E}_{i_t} \left[ \frac{(\nabla^2 \Psi(q_t))_{i_t, i_t}^{-1}}{q_{t,i_t}^2} \right] + \frac{\max_{q^* \in Q} D_\Psi(q^*, \mathbf{1}/m)}{\eta_q} \right).$$

174 A formal proof can be found in Appendix B. We will see how specific choices of the regularizer  $\Psi$   
175 yield various algorithms and convergence rates for group DRO and others in the next subsections. A  
176 few remarks on the regularizers, step sizes, and projection step are in order.

177 **Regularizer.** Although Algorithm 1 works with general  $\Psi$ , we can choose a specific regularizer for  
178  $Q$  appearing in applications, e.g, the probability simplex, scaled  $k$ -set polytope, or a permutahedron.  
179 In the next subsections, we show that the entropy regularizer  $\Psi(x) = \sum_i (x_i \log x_i - x_i)$  and Tsallis  
180 entropy regularizer  $\Psi(x) = 2(1 - \sum_i \sqrt{x_i})$  yield efficient algorithms with improved convergence  
181 rates for these cases.

182 **Step sizes.** The theorem includes decreasing step sizes such as  $\eta_{\theta,t} = \frac{D}{mG\sqrt{t}}$  in addition to fixed  
183 step sizes. Decreasing step sizes have the advantage that we do not require the knowledge of  $T$   
184 at the beginning of the algorithm but come at the cost of an extra constant factor in the expected  
185 convergence rate. Since both step size policies give the asymptotically same convergence rate, we  
186 describe only fixed step sizes in the theorems in the next subsections. In practice, decreasing step  
187 sizes stabilize the algorithm and often outperform fixed step sizes.

188 **Projection step.** In general, the Bregman projection  $\text{argmin}_{q \in Q} D_\Psi(q, \tilde{q}_{t+1})$  is convex, but may  
189 be costly to compute. For the applications described in Section 2,  $Q$  is a permutahedron. In this case,

---

<sup>1</sup>We make a standard assumption that the regularizer  $\Psi$  is differentiable and strictly convex, and satisfies  
 $\|\nabla \Psi(x)\| \rightarrow +\infty$  as  $x$  tends to the boundary of  $Q$ .

**Algorithm 2** GDRO-EXP3

**Require:** initial solution  $\theta_1 \in \Theta$ , number of iterations  $T$ , and step sizes  $\eta_{\theta,t} > 0$  ( $t \in [T]$ ),  $\eta_q > 0$ .

- 1: Let  $q_t = (1/m, \dots, 1/m)$ .
- 2: **for**  $t = 1, \dots, T$  **do**
- 3:   Sample  $i_t \sim q_t$ .
- 4:   Call the stochastic oracle to obtain  $z \sim P_{i_t}$ .
- 5:    $\theta_{t+1} \leftarrow \text{proj}_{\Theta}(\theta_t - \eta_{\theta,t} \nabla_{\theta} \ell(\theta_t; z))$
- 6:    $\tilde{q}_{t+1} \leftarrow q_t \exp\left(\frac{\eta_q \ell(\theta_t; z) \mathbf{e}_{i_t}}{q_{t,i_t}}\right)$
- 7:    $q_{t+1} \leftarrow \frac{\tilde{q}_{t+1}}{\sum_i \tilde{q}_{t+1,i}}$ .
- 8: **return**  $\frac{1}{T} \sum_{t=1}^T \theta_t$ .

**Algorithm 3** GDRO-TINF

**Require:** initial solution  $\theta_1 \in \Theta$ , number of iterations  $T$ , and step sizes  $\eta_{\theta,t} > 0$  ( $t \in [T]$ ),  $\eta_q > 0$ .

- 1: Let  $q_t = (1/m, \dots, 1/m)$ .
- 2: **for**  $t = 1, \dots, T$  **do**
- 3:   Sample  $i_t \sim q_t$ .
- 4:   Call the stochastic oracle to obtain  $z \sim P_{i_t}$ .
- 5:    $\theta_{t+1} \leftarrow \text{proj}_{\Theta}(\theta_t - \eta_{\theta,t} \nabla_{\theta} \ell(\theta_t; z))$
- 6:    $\tilde{q}_{t+1} \leftarrow q_t \left( \mathbf{1} - \frac{\eta_q \sqrt{q_t}}{q_{t,i_t}} \ell(\theta_t; z) \mathbf{e}_{i_t} \right)^{-2}$
- 7:   Compute  $\alpha \in \mathbb{R}$  such that  $\sum_{i=1}^m (\sqrt{\tilde{q}_{t+1,i}} - \alpha)^{-2} = 1$ .
- 8:    $q_{t+1} \leftarrow (\sqrt{\tilde{q}_{t+1}} - \alpha \mathbf{1})^{-2}$
- 9: **return**  $\frac{1}{T} \sum_{t=1}^T \theta_t$ .

190 it is known that the Bregman projection with respect to the entropy and Tsallis entropy regularizers  
 191 can be done in  $O(m \log m)$  time [Lim and Wright, 2016]. If  $Q$  is the probability simplex, we even  
 192 have a closed form for the Bregman projection.

193 **3.2 Algorithms for Group DRO**

194 As applications of our generic algorithm, we now describe two concrete algorithms for group DRO (2)  
 195 and their convergence rates.

196 **GDRO-EXP3.** Let  $\Psi$  be the entropy regularizer, which corresponds to the EXP3 algorithm for  
 197 the  $q$ -player. The resulting algorithm, GDRO-EXP3, is shown in Algorithm 2. The update is in a  
 198 closed formula and its complexity is  $O(m + n)$  time. The convergence rate follows from Theorem 1.

199 **Theorem 2.** *If  $\eta_{\theta,t}$  is nonincreasing, GDRO-EXP3 (Algorithm 2) achieves the expected convergence*  
 200 *rate*

$$\mathbf{E}[\varepsilon_T] \leq \frac{1}{T} \left( \frac{G^2}{2} \sum_{t=1}^T \eta_{\theta,t} + \frac{D^2}{2\eta_{\theta,T}} + \frac{mM^2}{2} \eta_q T + \frac{\log m}{\eta_q} \right). \quad (4)$$

201 For  $\eta_{\theta,t} = \frac{D}{G\sqrt{T}}$  and  $\eta_q = \sqrt{\frac{2\log m}{mM^2T}}$ , we obtain

$$\mathbf{E}[\varepsilon_T] \leq \sqrt{2} \frac{\sqrt{G^2 D^2 + 2M^2 m \log m}}{\sqrt{T}}.$$

202 **GRDO-TINF.** We can further improve the convergence rate using the Tsallis entropy regularizer  
 203 at the cost of a slightly higher iteration complexity. The update of  $q_t$  is then

$$\tilde{q}_{t+1} = q_t \left( \mathbf{1} - \frac{\eta_q \sqrt{q_t}}{q_{t,i_t}} \ell(\theta_t; z) \mathbf{e}_{i_t} \right)^{-2}, \quad q_{t+1} := \left( \sqrt{\tilde{q}_{t+1}} - \alpha \mathbf{1} \right)^{-2},$$

204 where the multiplication, square-root, and power operations are entry-wise and  $\alpha \in \mathbb{R}$  is the unique  
 205 solution of equation  $\sum_{i=1}^m (\sqrt{\tilde{q}_{t+1,i}} - \alpha)^{-2} = 1$ . The solution  $\alpha$  can be computed via the Newton  
 206 method. Practically, one can use  $\alpha$  in the previous iteration to warm start the Newton method. In  
 207 each iteration, the algorithm performs a single orthogonal projection onto  $\Theta$ , the Newton method for  
 208 finding  $\alpha$ , and  $O(m + n)$  operations to update  $\theta_t, q_t$ . The pseudocode is given in Algorithm 3. From  
 209 Theorem 1, we obtain the following convergence rate.

210 **Theorem 3.** *If  $\eta_{\theta,t}$  is nonincreasing, GDRO-TINF (Algorithm 3) achieves the expected convergence*  
 211 *rate*

$$\mathbf{E}[\varepsilon_T] \leq \frac{1}{T} \left( \frac{G^2}{2} \sum_{t=1}^T \eta_{\theta,t} + \frac{D^2}{2\eta_{\theta,T}} + \sqrt{m} M^2 \eta_q T + \frac{\sqrt{m}}{\eta_q} \right). \quad (5)$$

For  $\eta_{\theta,t} = \frac{D}{G\sqrt{T}}$  and  $\eta_q = \frac{1}{M\sqrt{T}}$ , we obtain

$$\mathbf{E}[\varepsilon_T] \leq \sqrt{2} \frac{\sqrt{G^2 D^2 + 4M^2 m}}{\sqrt{T}}.$$

**Comparison to Sagawa *et al.* [2020].** Our algorithms improve the convergence rate of Sagawa *et al.* [2020] by a factor of  $O(\sqrt{m})$ ; see Table 1. The reason lies in the choice of gradient estimator. All algorithms are stochastic no-regret dynamics. As outlined above, their convergence hence can be bounded by the regrets of the players, which depend on the variance of the local norm of the gradient estimators. Their strategy is based on uniform sampling that yields a variance of  $O(m)$  for both players, whereas our bound is  $O(\sqrt{m})$  thanks to the gradient estimators tailored to the regularizer of OMD. More details may be found in Appendix D.

### 3.3 Algorithm for weighted ranking of group losses

We now consider a more general case that  $Q$  is a permutahedron. Applying Algorithm 1 with the Tsallis entropy regularizer, we obtain the following result.

**Theorem 4.** *If  $\eta_{\theta,t}$  is nonincreasing and  $Q$  is a permutahedron, Algorithm 1 with the Tsallis entropy regularizer achieves the same expected convergence rate as Theorem 3. Furthermore, the iteration complexity is  $O(m \log m + n)$ .*

This implies a convergence rate of  $O(\sqrt{\frac{G^2 D^2 + M^2 m}{T}})$  for empirical CVaR optimization, which improves  $O(\sqrt{\frac{G^2 D^2 + M^2 m \log m}{T}})$  convergence by Curi *et al.* [2020]. Furthermore, their iteration complexity is  $O(m^3)$  due to the  $k$ -DPP sampling step, so our algorithm is even faster in terms of iteration complexity.

## 4 Lower bound

Theorem 3 states that we can find an  $\varepsilon$ -optimal solution for group DRO in  $O(\frac{G^2 D^2 + M^2 m}{\varepsilon^2})$  calls to stochastic oracles. Next, we show that this query complexity is information-theoretically optimal.

Let  $\mathcal{L}$  be a class of convex  $G$ -Lipschitz loss functions  $\ell : \Theta \rightarrow [0, M]$ . Given a loss function  $\ell \in \mathcal{L}$ , and an  $m$ -set  $\mathcal{P} = \{P_1, \dots, P_m\}$  of distributions, denote the optimality gap of  $\theta \in \Theta$  by

$$R(\theta, \ell, \mathcal{P}) = \max_{P \in \mathcal{P}} \mathbf{E}_{z \sim P} [\ell(\theta; z)] - \min_{\theta^* \in \Theta} \max_{P \in \mathcal{P}} \mathbf{E}_{z \sim P} [\ell(\theta^*; z)].$$

Let  $\mathcal{A}_T$  be the set of algorithms that outputs  $\hat{\theta} \in \Theta$  making  $T$  queries to the stochastic oracle.

**Theorem 5 (Lower Bound).**

$$\inf_{\hat{\theta} \in \mathcal{A}_T} \sup_{\ell \in \mathcal{L}, \Theta, \mathcal{P}} \mathbf{E}_{\mathcal{P}} [R(\hat{\theta}, \ell, \mathcal{P})] \geq \Omega \left( \max \left\{ \frac{GD}{\sqrt{T}}, M \sqrt{\frac{m}{T}} \right\} \right),$$

where  $\Theta$  runs over convex sets with diameter  $D$  and  $\mathcal{P}$  over  $m$ -sets of distributions, and  $\mathbf{E}_{\mathcal{P}}$  denotes the expectation over outcomes of the stochastic oracle in  $\mathcal{P}$ .

As  $\sqrt{x+y} \leq \sqrt{x} + \sqrt{y} \leq \sqrt{2(x+y)}$  for  $x, y \geq 0$ , this theorem immediately implies that the minimax convergence rate is  $\Omega \left( \sqrt{\frac{G^2 D^2 + M^2 m}{T}} \right)$ , which equals the convergence rate achieved by Algorithm 3 up to a constant factor.

**Proof Sketch.** It suffices to show two lower bounds  $\frac{GD}{\sqrt{T}}$  and  $M \sqrt{\frac{m}{T}}$  independently. The former is a well-known lower bound for stochastic convex optimization [Agarwal *et al.*, 2012]. To illustrate the latter, we take an algorithmic dependent point of view via the Le cam’s method. For any algorithm in  $\mathcal{A}_T$ , we need to construct instances  $\mathcal{P}_0, \mathcal{P}_1$  such that the total variation distance between the distributions over the query outcomes (they depend on both the behavior of the algorithm and the instance) with respect to  $\mathcal{P}_0$  and  $\mathcal{P}_1$  is small. On the other hand, the objective function of the two

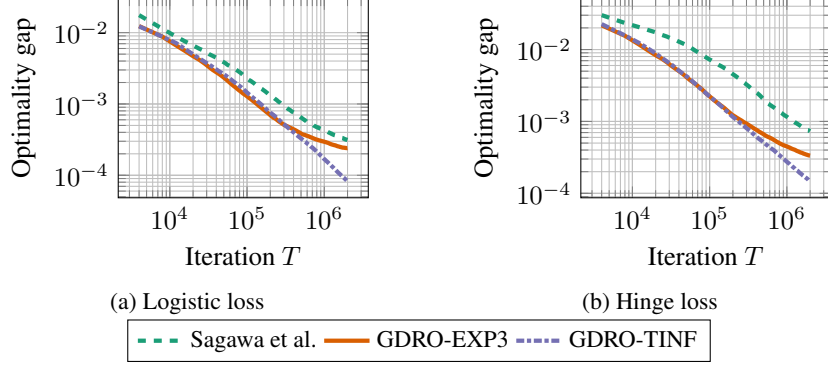

Figure 1: Results on Adult dataset

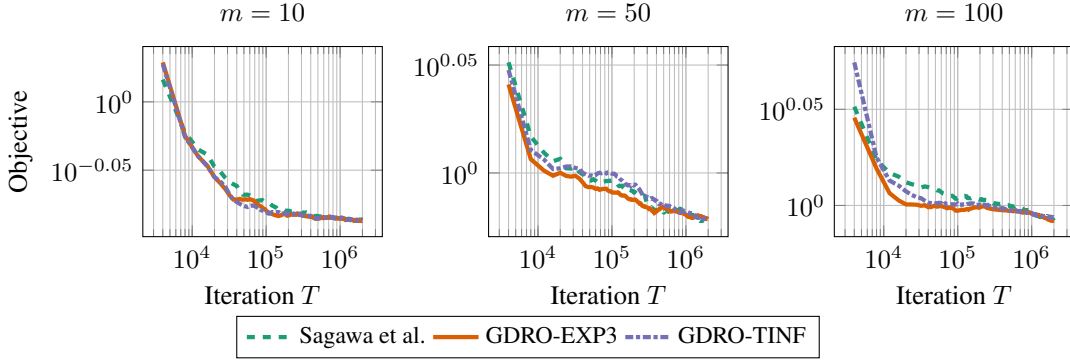

Figure 2: Results on synthetic dataset

instances must be well-separated, i.e., any fixed  $\theta$  is  $\delta$  sub-optimal for either  $\mathcal{P}_0$  or  $\mathcal{P}_1$ . So, any algorithm that solves group DRO up to error  $\delta$  needs to distinguish two instances  $\mathcal{P}_0$  and  $\mathcal{P}_1$ . This implies a query lower bound because the total variation distance of the outcome distributions of these instances is small. The challenge is how to construct such instances for the regime of small dimensions of  $\theta$ , e.g,  $n = 1$ . To this end, we carefully construct linear functions for  $m$  groups using opposite slopes. Then, based on the behavior of the algorithm, we tweak the noise bias in one of the groups with a positive slope, in a way that any fixed  $\theta$  is  $\Theta(\delta)$  sub-optimal for one of these instances. For the detailed proof, see Appendix C.

## 5 Experiments

In this section, we compare our algorithms with the known algorithm using real-world and synthetic datasets. We follow the setup in [Namkoong and Duchi, 2016].

**Adult dataset.** For the real-world dataset, we use Adult dataset [Dua and Graff, 2017]. The dataset consists of age, gender, race, educational background, and many other attributes of 48,842 individuals from the US census. The task is to predict whether the person’s income is greater than 50,000 USD or not. We set up 6 groups based on the race and gender attributes: each group corresponds to a combination of {black, white, others}  $\times$  {female, male}. Converting the categorical features to dummy variables, we obtain a 101-dimensional feature vector  $a \in \mathbb{R}^n$  ( $n = 101$ ) for each individual. We train the linear model with the logistic loss and hinge loss functions. The group-DRO objective is the worst empirical loss over the 6 groups:

$$\max_{i=1}^6 \frac{1}{|I_i|} \sum_{(a,b) \in I_i} \ell(\theta; a, b),$$

where  $I_i$  is the set of data points in the  $i$ th group. The feasible region is set to the Euclidean ball of radius  $D = 10$ .



**Synthetic dataset.** To observe the performance of the algorithms over the regime of high-dimension model parameters and the larger number of groups, we also conducted experiments using the following synthetic instances. First, we set  $n = 500$  and varied  $m \in \{10, 50, 100\}$ . For each group  $i \in [m]$ , we generated the true classifier  $\theta_i^* \in \mathbb{R}^n$  from the uniform distribution over the unit sphere in  $\mathbb{R}^n$ . The  $i$ th group distribution  $P_i$  was the empirical distribution of 1,000 data points, where each data point  $(a, b)$  was drawn as  $a \sim N(0, I_n)$  and  $b = \text{sign}(a^\top \theta_i^*)$  with probability 0.9 and  $b = -\text{sign}(a^\top \theta_i^*)$  with probability 0.1. We trained the linear model with the hinge loss function. Finally, the group-DRO objective is

$$\max_{i=1}^m \mathbf{E}_{(a,b) \sim P_i} [\ell(\theta; a, b)].$$

The feasible region is set to the Euclidean ball of radius  $D = 10$ .

## 5.1 Algorithms

We implemented GDRO-EXP3, GDRO-TINF, and the algorithm in [Sagawa *et al.*, 2020] in Python. We ran our algorithms for  $T = 2,000,000$  iterations.

**Inner online algorithms.** It is known that EXP3 has a variance as large as  $O(T^2)$  [Lattimore and Szepesvári, 2020]. Therefore, vanilla EXP3 often fails to achieve a sublinear regret even though it achieves  $O(\sqrt{T})$  regret *in expectation*. This large variance makes it difficult to reliably evaluate the performance of the algorithms. To stabilize the algorithms, we replaced EXP3 with its variation, EXP3P [Auer *et al.*, 2003], which achieves  $O(\sqrt{T})$  regret *with high probability*. Note that this change does not harm our expected convergence bounds.

**Step sizes.** The choice of step sizes is crucial to the practical performance of first-order methods. We found that the decreasing step size  $\eta_{\theta,t} \sim 1/\sqrt{t}$  for  $\theta_t$  and the fixed step size  $\eta_q \sim 1/\sqrt{T}$  for  $q_t$  gave the best results. More precisely, we set  $\eta_{\theta,t} = \frac{C_\theta D}{\sqrt{t}}$  ( $t \in [T]$ ) and  $\eta_q = C_q \sqrt{\frac{\log m}{mT}}$ , where  $C_\theta \in [0.1, 5.0]$  and  $C_q \in [0.1, 3.0]$  are hyper-parameters tuned for each algorithm. We used the best hyper-parameter found by Optuna [Akiba *et al.*, 2019] for the shown results.

**Mini-batch.** The use of mini-batch often improves the stability of stochastic gradient algorithms. In our experiments, we used mini-batches of size 10 to evaluate stochastic gradients. Neither the objective values of outputs nor the stability was improved with larger mini-batch sizes. The group DRO objective is evaluated using the entire dataset.

**Initialization.** For both datasets, we initialized the algorithms with  $\theta_1 = \mathbf{0}$ .

## 5.2 Results

We show the results of our experiment in Figures 1 and 2.

**Adult dataset.** In Figure 1, we plot the optimality gap of the averaged iterate  $\frac{1}{T} \sum_{t=1}^T \theta_t$  against the number of iteration  $T$ . We observe that all the algorithms converge with a rate roughly  $T^{-0.5}$  for both loss functions, consistent with our convergence bound. Furthermore, our algorithms (GDRO-EXP3 and GDRO-TINF) achieve faster convergence compared to the algorithm by Sagawa *et al.* [2020]. Interestingly, GDRO-TINF achieves a  $10^{-4}$  optimality gap in  $T = 10^6$  iterations, which is faster than the theoretical  $T^{-0.5}$  rate in Theorem 3.

**Synthetic dataset.** In Figure 2, we plot the objective values of the averaged iterate against the number of iterations. For all the values of  $m$ , our algorithms (especially GDRO-EXP3) consistently achieve smaller loss values faster than the known algorithm. The performance gap between our algorithms and the known algorithm increased as  $m$  grows, which verifies that our algorithms have better dependence on  $m$  in the convergence rate.

## References

- Alekh Agarwal, Peter L. Bartlett, Pradeep Ravikumar, and Martin J. Wainwright. Information-theoretic lower bounds on the oracle complexity of stochastic convex optimization. *IEEE Transactions on Information Theory*, pages 3235–3249, 2012.
- Takuya Akiba, Shotaro Sano, Toshihiko Yanase, Takeru Ohta, and Masanori Koyama. Optuna: A next-generation hyperparameter optimization framework. In *Proceedings of the 25rd ACM SIGKDD International Conference on Knowledge Discovery and Data Mining*, 2019.
- Peter Auer, Nicolò Cesa-Bianchi, Yoav Freund, and Robert E. Schapire. The nonstochastic multiarmed bandit problem. *SIAM Journal on Computing*, 32(1):48–77, 2003.
- Yujia Bao, Shiyu Chang, and Regina Barzilay. Predict then interpolate: A simple algorithm to learn stable classifiers. In *Proceedings of the 38th International Conference on Machine Learning*, volume 139, pages 640–650, 2021.
- Dimitris Bertsimas, Vishal Gupta, and Nathan Kallus. Data-driven robust optimization. *Mathematical Programming*, 167(2):235–292, 2018.
- Jose Blanchet, Yang Kang, and Karthyek Murthy. Robust wasserstein profile inference and applications to machine learning. *Journal of Applied Probability*, 56(3):830–857, 2019.
- Joy Buolamwini and Timnit Gebru. Gender shades: Intersectional accuracy disparities in commercial gender classification. In *Proceedings of the 1st Conference on Fairness, Accountability and Transparency*, pages 77–91, 2018.
- Yair Carmon, Arun Jambulapati, Yujia Jin, and Aaron Sidford. Thinking inside the ball: Near-optimal minimization of the maximal loss. In *Proceedings of 34th Conference on Learning Theory*, volume 134 of *Proceedings of Machine Learning Research*, pages 866–882, 2021.
- Nicolo Cesa-Bianchi and Gabor Lugosi. *Prediction, Learning, and Games*. Cambridge University Press, 2006.
- Sebastian Curi, Kfir Y. Levy, Stefanie Jegelka, and Andreas Krause. Adaptive sampling for stochastic risk-averse learning. In *Advances in Neural Information Processing Systems*, pages 1036–1047, 2020.
- Emily Diana, Wesley Gill, Ira Globus-Harris, Michael Kearns, Aaron Roth, and Saeed Sharifi-Malvajerdi. Lexicographically fair learning: Algorithms and generalization. In *Proceedings of the 2nd Symposium on Foundations of Responsible Computing*, pages 6:1–6:23, 2021.
- Dheeru Dua and Casey Graff. UCI machine learning repository, 2017.
- John C. Duchi and Hongseok Namkoong. Learning models with uniform performance via distributionally robust optimization. *The Annals of Statistics*, 49(3):1378 – 1406, 2021.
- Peyman Mohajerin Esfahani and Daniel Kuhn. Data-driven distributionally robust optimization using the wasserstein metric: Performance guarantees and tractable reformulations. *Mathematical Programming*, 171(1):115–166, 2018.
- Joel Goh and Melvyn Sim. Distributionally robust optimization and its tractable approximations. *Operations Research*, 58(4-part-1):902–917, 2010.
- Tatsunori Hashimoto, Megha Srivastava, Hongseok Namkoong, and Percy Liang. Fairness without demographics in repeated loss minimization. In *Proceedings of the 35th International Conference on Machine Learning*, pages 1929–1938, 2018.
- Elad Hazan. *Introduction to Online Convex Optimization*. 2016.
- Dirk Hovy and Anders Søgaard. Tagging performance correlates with author age. In *Proceedings of the 53rd Annual Meeting of the Association for Computational Linguistics and the 7th International Joint Conference on Natural Language Processing*, pages 483–488, 2015.

354 Weihua Hu, Gang Niu, Issei Sato, and Masashi Sugiyama. Does distributionally robust supervised  
355 learning give robust classifiers? In *Proceedings of the 35th International Conference on Machine*  
356 *Learning*, pages 2029–2037, 2018.

357 Jikai Jin, Bohang Zhang, Haiyang Wang, and Liwei Wang. Non-convex distributionally robust  
358 optimization: Non-asymptotic analysis. In *Advances in Neural Information Processing Systems*,  
359 volume 34, pages 2771–2782, 2021.

360 David Jurgens, Yulia Tsvetkov, and Dan Jurafsky. Incorporating dialectal variability for socially  
361 equitable language identification. In *Proceedings of the 55th Annual Meeting of the Association*  
362 *for Computational Linguistics*, pages 51–57, 2017.

363 Johannes Kirschner, Ilija Bogunovic, Stefanie Jegelka, and Andreas Krause. Distributionally ro-  
364 bust bayesian optimization. In *Proceedings of the 33rd International Conference on Artificial*  
365 *Intelligence and Statistics*, pages 2174–2184, 2020.

366 Tor Lattimore and Csaba Szepesvári. *Bandit algorithms*. Cambridge University Press, 2020.

367 Cong Han Lim and Stephen J. Wright. Efficient bregman projections onto the permutahedron and  
368 related polytopes. In *Proceedings of the 19th International Conference on Artificial Intelligence*  
369 *and Statistics*, pages 1205–1213, 2016.

370 Natalia L Martinez, Martin A Bertran, Afroditi Papadaki, Miguel Rodrigues, and Guillermo Sapiro.  
371 Blind pareto fairness and subgroup robustness. In *Proceedings of the 38th International Conference*  
372 *on Machine Learning*, pages 7492–7501, 2021.

373 Hongseok Namkoong and John C Duchi. Stochastic gradient methods for distributionally robust  
374 optimization with  $f$ -divergences. In *Advances in Neural Information Processing Systems*, 2016.

375 Yonatan Oren, Shiori Sagawa, Tatsunori Hashimoto, and Percy Liang. Distributionally robust  
376 language modeling. In *Proceedings of the Conference on Empirical Methods in Natural Language*  
377 *Processing and the 9th International Joint Conference on Natural Language Processing (EMNLP-*  
378 *IJCNLP)*, pages 4227–4237, 2019.

379 Qi Qi, Zhishuai Guo, Yi Xu, Rong Jin, and Tianbao Yang. An online method for a class of  
380 distributionally robust optimization with non-convex objectives. In *Advances in Neural Information*  
381 *Processing Systems*, volume 34, pages 10067–10080, 2021.

382 Alexander Rakhlin and Karthik Sridharan. Optimization, learning, and games with predictable  
383 sequences. In *Advances in Neural Information Processing Systems*, 2013.

384 Shiori Sagawa, Pang Wei Koh, Tatsunori B. Hashimoto, and Percy Liang. Distributionally robust  
385 neural networks for group shifts: On the importance of regularization for worst-case generalization.  
386 In *The 8th International Conference on Learning Representations*, 2020.

387 Herbert Scarf. A min-max solution of an inventory problem. *Studies in the mathematical theory of*  
388 *inventory and production*, 1958.

389 Matthew Staib and Stefanie Jegelka. Distributionally robust optimization and generalization in kernel  
390 methods. In *Advances in Neural Information Processing Systems*, 2019.

391 Matthew Staib, Bryan Wilder, and Stefanie Jegelka. Distributionally robust submodular maximization.  
392 In *Proceedings of the 22nd International Conference on Artificial Intelligence and Statistics*, pages  
393 506–516, 2019.

394 Robert Williamson and Aditya Menon. Fairness risk measures. In *Proceedings of the 36th Interna-*  
395 *tional Conference on Machine Learning*, pages 6786–6797, 2019.

396 Jingzhao Zhang, Aditya Krishna Menon, Andreas Veit, Srinadh Bhojanapalli, Sanjiv Kumar, and  
397 Suvrit Sra. Coping with label shift via distributionally robust optimisation. In *The 9th International*  
398 *Conference on Learning Representations*, 2021.

399 Julian Zimmert and Yevgeny Seldin. Tsallis-inf: An optimal algorithm for stochastic and adversarial  
400 bandits. *Journal of Machine Learning Research*, 22(28):1–49, 2021.

401 Martin Zinkevich. Online convex programming and generalized infinitesimal gradient ascent. In *Pro-*  
402 *ceedings of the 20th International Conference on International Conference on Machine Learning*,  
403 pages 928–935, 2003.

## 404 Checklist

- 405 1. For all authors...
  - 406 (a) Do the main claims made in the abstract and introduction accurately reflect the paper’s  
407 contributions and scope? [Yes]
  - 408 (b) Did you describe the limitations of your work? [No]
  - 409 (c) Did you discuss any potential negative societal impacts of your work? [No] This paper  
410 is a theoretical paper.
  - 411 (d) Have you read the ethics review guidelines and ensured that your paper conforms to  
412 them? [Yes]
- 413 2. If you are including theoretical results...
  - 414 (a) Did you state the full set of assumptions of all theoretical results? [Yes] See Assump-  
415 tion 1.
  - 416 (b) Did you include complete proofs of all theoretical results? [Yes] Omitted Proof can  
417 be found in the supplemental material.
- 418 3. If you ran experiments...
  - 419 (a) Did you include the code, data, and instructions needed to reproduce the main experi-  
420 mental results (either in the supplemental material or as a URL)? [Yes] The experiment  
421 code can be found in the supplemental material.
  - 422 (b) Did you specify all the training details (e.g., data splits, hyperparameters, how they  
423 were chosen)? [Yes] See Section 5.
  - 424 (c) Did you report error bars (e.g., with respect to the random seed after running experi-  
425 ments multiple times)? [No]
  - 426 (d) Did you include the total amount of compute and the type of resources used (e.g., type  
427 of GPUs, internal cluster, or cloud provider)? [Yes]
- 428 4. If you are using existing assets (e.g., code, data, models) or curating/releasing new assets...
  - 429 (a) If your work uses existing assets, did you cite the creators? [Yes]
  - 430 (b) Did you mention the license of the assets? [Yes]
  - 431 (c) Did you include any new assets either in the supplemental material or as a URL? [No]
  - 432 (d) Did you discuss whether and how consent was obtained from people whose data you’re  
433 using/curating? [No] We used a public dataset.
  - 434 (e) Did you discuss whether the data you are using/curating contains personally identifiable  
435 information or offensive content? [No]
- 436 5. If you used crowdsourcing or conducted research with human subjects...
  - 437 (a) Did you include the full text of instructions given to participants and screenshots, if  
438 applicable? [No] Not applicable
  - 439 (b) DidNo describe any potential participant risks, with links to Institutional Review Board  
440 (IRB) approvals, if applicable? [No]
  - 441 (c) DidNo include the estimated hourly wage paid to participants and the total amount  
442 spent on participant compensation? [No]

## A Preliminaries of online convex optimization and no-regret dynamics

In this section, we briefly introduce necessary results from online convex optimization (OCO). For the further details of OCO, refer to Hazan [2016].

### A.1 Regret Bounds of OCO algorithms

Let  $X \subseteq \mathbb{R}^d$  be a compact convex set and  $\Psi : X \rightarrow \mathbb{R}$  be a strictly convex function such that  $\|\partial\Psi(x)\| \rightarrow +\infty$  as  $x \rightarrow \partial X$ . Online mirror descent (OMD) is the following online learning algorithm. For  $t = 1, \dots, T$ :

1. Let  $\tilde{x}_{t+1} \in \mathbb{R}^n$  be the solution of  $\nabla\Psi(\tilde{x}_{t+1}) = \nabla\Psi(x_t) - \eta_t \nabla\Psi(\nabla_t)$ , where  $\eta_t > 0$  is a step size and  $\nabla_t = \nabla f_t(x_t)$  is the gradient feedback of round  $t$ .
2. Let  $x_{t+1} \in \operatorname{argmin}_{x \in X} D_\Psi(x, \tilde{x}_{t+1})$ , where  $D_\Psi(x, y) = \Psi(x) - \Psi(y) - \nabla\Psi(y)^\top(x - y)$  is the Bregman divergence with respect to  $\Psi$ .

We use the following regret bound.

**Lemma 1** (Regret Bound of OMD). *OMD satisfies that for any  $x^* \in X$ ,*

$$\sum_{t=1}^T f_t(x_t) - \sum_{t=1}^T f_t(x^*) \leq \frac{1}{2} \sum_{t=1}^T \eta_t \|\nabla_t\|_{t,*}^2 + \frac{D_\Psi(x^*, x_1)}{\eta_1} + \sum_{t=2}^T \left( \frac{1}{\eta_t} - \frac{1}{\eta_{t-1}} \right) D(x^*, x_t), \quad (6)$$

where  $\|x\|_t$  denotes the local norm, i.e.,  $\|x\|_t := \sqrt{x^\top \nabla^2 \Psi(z_t) x}$  for some  $z_t \in [x_t, \tilde{x}_{t+1}]$  and  $\|x\|_{t,*} := \sqrt{x^\top \nabla^2 \Psi(z_t)^{-1} x}$  is its dual norm.

In this paper, we use regret bounds for the following specific choices of  $\Psi$ .

**Online Gradient Descent** OMD for  $\Psi(x) = \frac{1}{2}\|x\|_2^2$  on a generic compact convex set  $X$  is simply online gradient descent (OGD) Zinkevich [2003]:

$$x_{t+1} = \operatorname{proj}_X(x_t - \eta_t \nabla_t).$$

Note that  $D(x, y) = \frac{1}{2}\|x - y\|_2^2$  and the minimizing the Bregman divergence is given by orthogonal projection.

**Lemma 2** (Regret Bound of OGD). *OMD satisfies that for any  $x^* \in X$ ,*

$$\sum_{t=1}^T f_t(x_t) - \sum_{t=1}^T f_t(x^*) \leq \frac{1}{2} \sum_{t=1}^T \eta_t \|\nabla_t\|^2 + \frac{\|x^* - x_1\|_2^2}{2\eta_1} + \frac{1}{2} \sum_{t=2}^T \left( \frac{1}{\eta_t} - \frac{1}{\eta_{t-1}} \right) \|x^* - x_t\|_2^2. \quad (7)$$

If we use decreasing step sizes and  $\max_{t=1}^T \|x^* - x_t\| \leq D$ , we have

$$\sum_{t=1}^T f_t(x_t) - \sum_{t=1}^T f_t(x^*) \leq \frac{1}{2} \sum_{t=1}^T \eta_t \|\nabla_t\|^2 + \frac{D^2}{2\eta_T}. \quad (8)$$

**Hedge** OMD for  $\Psi(x) = \sum_i (x_i \log x_i - x_i)$  on the probability simplex is the Hedge algorithm.

$$\tilde{x}_{t+1} = x_t \exp(-\eta_t \nabla_t), \quad x_{t+1} = \frac{\tilde{x}_{t+1}}{\|\tilde{x}_{t+1}\|_1}.$$

Note that  $\nabla^2 \Psi(x) = \operatorname{diag}(1/x_i)$ . If  $\nabla_t \geq 0$ , then  $\tilde{x}_{t+1} \leq x_t$  and  $\|\nabla_t\|_{t,*} \leq \|\nabla_t\|_{\nabla^2 \Psi(x_t)^{-1}}$ . For  $x_1 = \mathbf{1}/d$ ,  $D(x^*, x_1) \leq \log d$  for any  $x^*$ .

**Lemma 3** (Regret Bound of Hedge). *For  $\nabla_t \geq 0$  ( $t = 1, \dots, T$ ), Hedge with fixed step size  $\eta > 0$  satisfies*

$$\sum_{t=1}^T f_t(x_t) - \sum_{t=1}^T f_t(x^*) \leq \frac{\eta}{2} \sum_{t=1}^T \|\nabla_t\|_{\nabla^2 \Psi(x_t)^{-1}}^2 + \frac{\log d}{\eta}. \quad (9)$$

470 **Tsallis-INF** OMD for  $\Psi(x) = 2(1 - \sum_i \sqrt{x_i})$  on the probability simplex is the Tsallis-INF  
 471 algorithm:

$$\tilde{x}_{t+1} \leftarrow x_t (\mathbf{1} - \nabla_t)^{-2}, \quad x_{t+1} = \left( \sqrt{\tilde{x}_{t+1}} - \alpha \mathbf{1} \right)^{-2},$$

472 where  $\alpha$  is the scaling factor such that  $x_{t+1}$  is in the probability simplex. Note that if  $\nabla_t \geq 0$ , then  
 473  $\tilde{x}_{t+1} \leq x_t$  and  $\|\nabla_t\|_{t,*} \leq \|\nabla_t\|_{\nabla^2 \Psi(x_t)^{-1}}$  as in Hedge. For  $x_1 = \mathbf{1}/d$ ,  $D(x^*, x_1) \leq \sqrt{d}$  for any  $x^*$ .

474 **Lemma 4** (Regret Bound of Tsallis-INF). *For  $\nabla_t \geq 0$  ( $t = 1, \dots, T$ ), Tsallis-INF with fixed step*  
 475 *size  $\eta > 0$  satisfies*

$$\sum_{t=1}^T f_t(x_t) - \sum_{t=1}^T f_t(x^*) \leq \frac{\eta}{2} \sum_{t=1}^T \|\nabla_t\|_{\nabla^2 \Psi(x_t)^{-1}}^2 + \frac{\sqrt{d}}{\eta}. \quad (10)$$

## 476 A.2 Convergence of No-Regret Dynamics

477 Let us write DRO (1) as

$$\min_{\theta \in \Theta} \max_{q \in Q} L(\theta, q).$$

478 Note that  $L(\theta, q)$  is convex in  $\theta$  and linear in  $q$ .

479 Let us assume that we apply stochastic no-regret dynamics to this minimax problem. The  $\theta$ -player  
 480 and  $q$ -player run online algorithms on  $\Theta$  and  $Q$ , respectively. The feedback to  $\theta$ -player and  $q$ -player  
 481 are  $\hat{\nabla}_{\theta,t}$  and  $\hat{\nabla}_{q,t}$ , respectively, which are unbiased gradient estimators of  $L$ . We can analyze the  
 482 optimality gap of stochastic no-regret dynamics using the regrets. Let

$$\varepsilon_T := \max_{q \in Q} L(\bar{\theta}_{1:T}, q) - \min_{\theta \in \Theta} \max_{q \in Q} L(\theta, q).$$

483 be the optimality gap of the averaged iterate  $\bar{\theta}_{1:T} = \frac{1}{T} \sum_{t=1}^T \theta_t$ . Let

$$R_\theta(T) = \sum_{t=1}^T L(\theta_t, q_t) - \min_{\theta \in \Theta} \sum_{t=1}^T L(\theta, q_t)$$

$$R_q(T) = \max_{q \in \Delta_m} \sum_{t=1}^T L(\theta_t, q) - \sum_{t=1}^T L(\theta_t, q_t)$$

484 be regrets of the  $\theta$ -player and  $q$ -player, respectively. Then, by the definition of regret and Jensen's  
 485 inequality, we have

$$\begin{aligned} \varepsilon_T &\leq \max_{q \in Q} \frac{1}{T} \sum_{t=1}^T L(\theta_t, q) - \min_{\theta \in \Theta} \max_{q \in Q} L(\theta, q) \\ &= \frac{R_q(T)}{T} + \frac{1}{T} \sum_{t=1}^T L(\theta_t, q_t) - \min_{\theta \in \Theta} \max_{q \in Q} L(\theta, q) \\ &\leq \frac{R_q(T)}{T} + \frac{1}{T} \sum_{t=1}^T L(\theta_t, q_t) - \min_{\theta \in \Theta} \frac{1}{T} \sum_{t=1}^T L(\theta, q_t) \\ &= \frac{R_q(T) + R_\theta(T)}{T}. \end{aligned}$$

486 Therefore,

$$\mathbf{E}[\varepsilon_T] \leq \frac{\mathbf{E}[R_q(T) + R_\theta(T)]}{T}, \quad (11)$$

487 where the expectation is taken over the randomness of gradient estimators and the algorithm.

## 488 B Ommited Proofs

### 489 B.1 Proof of Theorem 1

490 Let  $I_t$  and  $z_t$  be the chosen group and the sample at iteration  $t$ , respectively. Observe that Algorithm 1  
491 is stochastic no-regret dynamics with OGD, OMD, and gradient estimators

$$\hat{\nabla}_{\theta,t} := \nabla_{\theta} \ell(\theta_t; z_t), \quad \hat{\nabla}_{q,t} := \frac{1}{q_{t,I_t}} \ell(\theta_t; z_t) \mathbf{e}_{I_t}.$$

492 For OGD, we use Lemma 2. We have  $\|\hat{\nabla}_{\theta,t}\|_2^2 \leq G$  by assumption. Therefore,

$$\mathbf{E}[R_{\theta}(T)] \leq \frac{G^2}{2} \sum_{t=1}^T \eta_{\theta,t} + \frac{D^2}{2\eta_{\theta,T}}$$

493 by Lemma 2. For OMD, we use Lemma 1. Since  $\hat{\nabla}_{q,t} = \frac{1}{q_{t,I_t}} \ell(\theta_t; z_t) \mathbf{e}_{I_t}$ , we obtain

$$\begin{aligned} \|\hat{\nabla}_{q,t}\|_{\nabla^2 \Psi(q_t)^{-1}}^2 &= \frac{\ell(\theta_t; z_t)^2 (\nabla^2 \Psi(q_t)^{-1})_{I_t, I_t}}{q_{t,I_t}^2} \\ &\leq \frac{M^2 (\nabla^2 \Psi(q_t)^{-1})_{I_t, I_t}}{q_{t,I_t}^2}. \end{aligned}$$

494 Hence we obtain from Lemma 1,

$$\mathbf{E}[R_q(T)] \leq \frac{1}{2} \sum_{t=1}^T \eta_q \mathbf{E}_{I_t} \left[ \frac{(\nabla^2 \Psi(q_t))_{I_t, I_t}^{-1}}{q_{t,I_t}^2} \right] + \frac{D_{\Psi}(q^*, q_1)}{\eta_q}$$

495 for any  $q^* \in Q$ . Now the theorem is immediate from (11).

### 496 B.2 Proof of Theorem 2

497 Observe that Algorithm 2 is stochastic no-regret dynamics with OGD, Hedge, and the same gradient  
498 estimators as above. From Theorem 1, it suffices to bound the local norm with respect to the entropy  
499 regularizer.

500 Since  $\nabla^2 \Psi(q, t) = \text{diag}(q_t^{-1})$ , we obtain

$$\mathbf{E}_{I_t} \left[ \frac{(\nabla^2 \Psi(q_t))_{I_t, I_t}^{-1}}{q_{t,I_t}^2} \right] = \sum_{i=1}^m \Pr(I_t = i) \cdot \frac{1}{q_{t,i}} = m,$$

501 conditioned on  $I_1, \dots, I_{t-1}$ . Hence we obtain (4) from Theorem 1.

### 502 B.3 Proof of Theorem 3

503 Proof follows the same line as Theorem 2. The only difference is bounding the expected local norm  
504 with respect to the Tsallis entropy regularizer. Observe that  $\nabla^2 \Psi(q_t) = \frac{1}{2} \text{diag}(q_t^{-2/3})$ . Conditioned  
505 on  $I_1, \dots, I_{t-1}$ , we have

$$\begin{aligned} \mathbf{E}_{I_t} \left[ \frac{(\nabla^2 \Psi(q_t))_{I_t, I_t}^{-1}}{q_{t,I_t}^2} \right] &= \sum_{i=1}^m \Pr(I_t = i) \cdot \frac{2}{q_{t,i}^{1/2}} \\ &\leq 2 \sum_{i=1}^m q_{t,i}^{1/2} \\ &\leq 2\sqrt{m} \sqrt{\sum_{i=1}^m q_{t,i}} \\ &= 2\sqrt{m}. \end{aligned}$$

506 By Theorem 1, we obtain (5).

## C Details of Lower Bound

In this section, we prove Theorem 5.

We show that the minimax optimality gap is  $\Omega(GD/\sqrt{T})$  and  $\Omega(M\sqrt{m/T})$ , separately.

The first lower bound is immediate from the well-known lower bound of stochastic convex optimization (see, e.g., Agarwal *et al.* [2012]). Hence, it suffices to show the second lower bound. Note that it suffices to show the lower bound for a constant  $M$ ; below we construct instances with  $M = 2$ . The general case follows by scaling the objective with  $M$ .

Consider the following instance of group DRO which we construct with respect to an  $m$ -dimensional vector  $\mu = (\mu_1, \dots, \mu_m) \in [0, 1]^m$  of Bernoulli biases. Let  $\Theta$  be the unit interval  $[0, 1]$ . Let

$$\ell(\theta; Z) = Z_1 f_1(\theta) + Z_2 f_2(\theta) + Z_3,$$

where  $f_1(\theta) = \delta\theta$  and  $f_2(\theta) = \delta(1 - \theta)$  are linear functions over the interval  $[0, 1]$  and  $\delta > 0$  is the accuracy parameter determined later. We define a joint distribution  $P_i$  of  $Z$  as follows: for  $i = 1, \dots, m - 1$ , let

$$P_i : \begin{cases} Z_1 = 0 & \text{a.s.} \\ Z_2 = 1 & \text{a.s.} \\ Z_3 \sim \text{Ber}(\mu_i) \end{cases}$$

where *a.s.* stands for almost surely. For the last group distribution  $i = m$ , let

$$P_m : \begin{cases} Z_1 = 0 & \text{a.s.} \\ Z_2 = 1 & \text{a.s.} \\ Z_3 \sim \text{Ber}(\mu_m). \end{cases}$$

Then, for  $i = 1, \dots, m - 1$

$$\mathbf{E}_{Z \sim P_i}[\ell(\theta; Z)] = \delta(1 - \theta) + \mu_i,$$

and for  $i = m$ :

$$\mathbf{E}_{Z \sim P_i}[\ell(\theta; Z)] = \delta\theta + \mu_m.$$

The information of an outcome of a single stochastic oracle call to  $P_i$  is no more than that of a single sample of the  $i$ th Bernoulli distribution  $\text{Ber}(\mu_i)$ .

Let us fix  $\hat{\theta} \in \mathcal{A}_T$  arbitrarily. Let  $\mathcal{P}_0$  be the set of distributions  $(P_i)$  constructed as above with

$$\mu^0 = (1/2, 1/2, \dots, 1/2).$$

It is clear that  $\min_{\theta^* \in \Theta} \max_{P \in \mathcal{P}_0} \mathbf{E}_{Z \sim P}[\ell(\theta^*; Z)] = 1/2 + \delta/2$ , which is attained by  $\theta^* = 1/2$ .

We denote by  $Q_0$  the distribution of the outcomes of stochastic oracles observed by  $\hat{\theta}$  under  $\mathcal{P}_0$ .

Furthermore, let  $T_i$  be the expected number of queries to the  $i$ th stochastic oracle made by  $\hat{\theta}$  under

$\mathcal{P}_0$ . Since  $\hat{\theta}$  makes  $T$  queries in total, there exists  $i^* \neq m$  such that  $T_{i^*} \leq \frac{T}{m-1}$ . Let  $\mathcal{P}_1$  be the set of

distributions constructed as above with

$$\mu^1 = (1/2, 1/2, \dots, 1/2, 1/2 + \delta, 1/2, \dots, 1/2).$$

Now we show

$$\max\{R(\theta, \ell, \mathcal{P}_0), R(\theta, \ell, \mathcal{P}_1)\} \geq \delta/4 \quad (12)$$

for any  $\theta$ . We consider two different cases:  $\theta \geq \frac{3}{4}$  and  $\theta < \frac{3}{4}$ .

For  $\theta \geq 3/4$ , we have  $R(\theta, \ell, \mathcal{P}_0) \geq \frac{\delta}{4}$  since

$$\max_{P \in \mathcal{P}_0} \mathbf{E}_{Z \sim P}[\ell(\theta^*; Z)] = \max_{P \in \mathcal{P}_0} \mathbf{E}_{Z \sim P}[\ell(1/2; Z)] = \delta/2 + 1/2,$$

while

$$\max_{P \in \mathcal{P}_0} \mathbf{E}_{Z \sim P}[\ell(\theta; Z)] = \mathbf{E}_{Z \sim P_m}[\ell(\theta; Z)] \geq \delta/2 + \delta/4 + 1/2.$$



534 For the other case,  $\theta < 3/4$ , we show that  $R(\theta, \ell, \mathcal{P}_1) \geq \frac{\delta}{4}$ . This holds as

$$\max_{P \in \mathcal{P}_1} \mathbf{E}_{Z \sim P} [\ell(\theta^*; Z)] = \max_{P \in \mathcal{P}_1} \mathbf{E}_{Z \sim P} [\ell(1; Z)] = \delta + 1/2,$$

535 while

$$\max_{P \in \mathcal{P}_1} \mathbf{E}_{Z \sim P} [\ell(\theta; Z)] = \mathbf{E}_{Z \sim P_{i^*}} [\ell(\theta; Z)] \geq \delta + \delta/4 + 1/2.$$

536 We will use LeCam's two-point method. We denote by  $Q_1$  the distribution of the outcomes of  
537 stochastic oracles observed by  $\hat{\theta}$  under  $\mathcal{P}_1$ .

**Lemma 5** (LeCam's two-point method).

$$\inf_{\hat{\theta}} \sup_{\mathcal{P}} \mathbf{E}[R(\hat{\theta}, \ell, \mathcal{P})] \geq \frac{\delta}{2} (1 - d_{\text{TV}}(Q_0, Q_1)),$$

538 where the expectation is taken over the outcomes of the stochastic oracle and  $d_{\text{TV}}$  denotes the total  
539 variation distance.

540 We proceed to bound the right-hand side. By the Pinsker inequality,

$$d_{\text{TV}}(Q_0, Q_1)^2 \lesssim D_{\text{KL}}(Q_0 \parallel Q_1),$$

541 where  $D_{\text{KL}}$  denotes the Kullback-Leibler divergence. By the standard computation (see below for  
542 the formal proof), we can show the following lemma.

543 **Lemma 6.** For  $\delta \in (0, 1/4)$ ,

$$D_{\text{KL}}(Q_0 \parallel Q_1) \lesssim \delta^2 T_{i^*} \leq \frac{\delta^2 T}{m-1}.$$

544 Thus, setting  $\delta = O(\sqrt{m/T})$  and using Lemma 5, we obtain

$$\inf_{\hat{\theta} \in \mathcal{A}_T} \sup_{\ell \in \mathcal{L}, \mathcal{P}} R(\hat{\theta}, \ell, \mathcal{P}) \gtrsim \sqrt{\frac{m}{T}},$$

545 which completes the proof of Theorem 5.

546 *Proof of Lemma 6.* Now we prove Lemma 6 for the completeness. Let  $o_t$  be the outcome of the  
547  $t$ th query to the stochastic oracle. We will use the shorthand notation  $o_{1:t}$  to denote the outcomes  
548  $(o_1, \dots, o_t)$  up to the  $t$ th queries. Let  $I_t \in [m]$  be the index of stochastic oracles that  $\hat{\theta}$  queries in the  
549  $t$ th round. Note that  $I_t$  is determined by  $o_{1:t-1}$ . Then, we have

$$\begin{aligned} D_{\text{KL}}(Q_0 \parallel Q_1) &= \sum_{t=1}^T D_{\text{KL}}(Q_0(o_t \mid o_{1:t-1}) \parallel Q_1(o_t \mid o_{1:t-1})) && \text{(chain rule)} \\ &\leq \sum_{t=1}^T \mathbf{E}_{o_{1:t-1} \sim Q_0} [D_{\text{KL}}(\text{Ber}(\mu_{I_t}^0) \parallel \text{Ber}(\mu_{I_t}^1))] && \text{(data-processing inequality)} \\ &= \sum_{t=1}^T \mathbf{E}_{o_{1:t-1} \sim Q_0} [\mathbf{1}[I_t = i^*] D_{\text{KL}}(\text{Ber}(1/2) \parallel \text{Ber}(1/2 + \delta))] \\ &= T_{i^*} \cdot D_{\text{KL}}(\text{Ber}(1/2) \parallel \text{Ber}(1/2 + \delta)). \end{aligned}$$

550 Furthermore, for  $\delta \in (0, 1/4)$ ,

$$\begin{aligned} D_{\text{KL}}(\text{Ber}(1/2) \parallel \text{Ber}(1/2 + \delta)) &= \frac{1}{2} \log \frac{1/2}{1/2 + \delta} + \frac{1}{2} \log \frac{1/2}{1/2 - \delta} \\ &= \frac{1}{2} \log \left( 1 - \frac{2\delta}{1 + 2\delta} \right) + \frac{1}{2} \log \left( 1 + \frac{2\delta}{1 - 2\delta} \right) \\ &\leq -\frac{\delta}{1 + 2\delta} + \frac{\delta}{1 - 2\delta} \\ &\leq \frac{4\delta^2}{(1 + 2\delta)(1 - 2\delta)} \leq 8\delta^2. \end{aligned}$$

551 This completes the proof. □

## D Algorithm of Sagawa et al. for group DRO

Here we present the algorithm by Sagawa *et al.* [2020] for group DRO. Algorithm 4 shows the pseudocode. In each iteration  $t$ , the algorithm picks group index  $i_t \in [m]$  uniformly at random and obtains an i.i.d. sample  $z \sim P_{i_t}$ . Then, the algorithm performs one step of projected gradient descent and Hedge on  $\theta_t \in \Theta$  and  $q_t \in \Delta_m$ , respectively, where the gradients are estimated with  $i_t$  and  $z$ . Note that  $q_t$  is only used for the scaling factor of the gradient estimator. In each iteration, the algorithm performs a single orthogonal projection onto  $\Theta$  and  $O(m+n)$  operations to update  $\theta_t, q_t$ .

---

### Algorithm 4 Algorithm of Sagawa et al.

---

**Require:** initial solution  $\theta_1 \in \Theta$ , number of iteration  $T$ , and step sizes  $\eta_{\theta,t} > 0$  ( $t \in [T]$ ),  $\eta_q > 0$ .

- 1: Let  $q_t = (1/m, \dots, 1/m)$ .
  - 2: **for**  $t = 1, \dots, T$  **do**
  - 3:   Sample  $i_t \sim [m]$  uniformly at random.
  - 4:   Call the stochastic oracle to obtain  $z \sim P_{i_t}$ .
  - 5:    $\theta_{t+1} \leftarrow \text{proj}_{\Theta}(\theta_t - m q_{t,i_t} \eta_{\theta,t} \nabla_{\theta} \ell(\theta_t; z))$
  - 6:    $\tilde{q}_{t+1} \leftarrow q_t \exp(m \eta_q \ell(\theta_t; z) \mathbf{e}_{i_t})$  and  $q_{t+1} \leftarrow \frac{\tilde{q}_{t+1}}{\sum_i \tilde{q}_{t+1,i}}$ .
  - 7: **return**  $\frac{1}{T} \sum_{t=1}^T \theta_t$ .
- 

The following convergence bound was proved in Sagawa *et al.* [2020]. For completeness, we provide a simple proof.

**Theorem 6.** [Sagawa et al., 2020, Proposition 2] *If  $\eta_{\theta,t}$  is nonincreasing, Algorithm 4 achieves the expected convergence*

$$\mathbf{E}[\varepsilon_T] \leq \frac{1}{T} \left( \frac{m^2 G^2}{2} \sum_{t=1}^T \eta_{\theta,t} + \frac{D^2}{2\eta_{\theta,T}} + \frac{m^2 M^2}{2} \eta_q T + \frac{\log m}{\eta_q} \right).$$

For  $\eta_{\theta,t} = \frac{D}{mG\sqrt{T}}$  and  $\eta_q = \sqrt{\frac{2\log m}{m^2 M^2 T}}$ , we obtain

$$\mathbf{E}[\varepsilon_T] \leq \sqrt{2}m \sqrt{\frac{G^2 D^2 + 2M^2 \log m}{T}}.$$

*Proof.* Observe that Algorithm 4 is stochastic no-regret dynamics with OGD, Hedge, and gradient estimators

$$\hat{\nabla}_{\theta,t} = m q_{t,i_t} \nabla_{\theta} \ell(\theta; z_t), \quad \hat{\nabla}_{q,t} = m \ell(\theta_t; z_t) \mathbf{e}_{i_t}.$$

By the assumption, we always have

$$\|\hat{\nabla}_{\theta,t}\|_2^2 \leq m^2 G^2, \quad \|\hat{\nabla}_{q,t}\|_{\nabla^2 \Psi(q_t)^{-1}}^2 = \sum_{i=1}^m (\hat{\nabla}_{q,t})_i^2 q_{t,i} = m^2 q_{t,i_t} \ell(\theta_t, z_t)^2 \leq m^2 M^2.$$

By Lemma 2 and 3, we obtain

$$\begin{aligned} \mathbf{E}[R_{\theta}(T)] &\leq \frac{\eta_{\theta}}{2} m^2 G^2 T + \frac{D^2}{2\eta_{\theta}}, \\ \mathbf{E}[R_q(T)] &\leq \frac{\eta_q}{2} m^2 M^2 T + \frac{\log m}{\eta_q}. \end{aligned}$$

Optimizing step sizes, we have  $\mathbf{E}[R_{\theta}(T)] \leq mGD\sqrt{T}$  and  $\mathbf{E}[R_q(T)] \leq \sqrt{2}mM\sqrt{T\log m}$ .  $\square$

In the view of no-regret dynamics, the main difference between our algorithms and Sagawa *et al.* [2020] is the gradient estimators; see Table 2.

Table 2: Algorithms as stochastic no-regret dynamics

|             | $\mathcal{A}_\theta$ | $\mathcal{A}_q$ | $\hat{\nabla}_{\theta,t}, \hat{\nabla}_{q,t}$                                                                                                                              |
|-------------|----------------------|-----------------|----------------------------------------------------------------------------------------------------------------------------------------------------------------------------|
| Algorithm 4 | OGD                  | Hedge           | $\hat{\nabla}_{\theta,t} := mq_{t,i} \nabla_\theta \ell(\theta; z), \quad \hat{\nabla}_{q,t} := m \ell(\theta_t; z) \mathbf{e}_i. \quad (i \sim [m], z \sim P_i)$          |
| Algorithm 2 | OGD                  | Hedge           | $\hat{\nabla}_{\theta,t} := \nabla_\theta \ell(\theta_t; z), \quad \hat{\nabla}_{q,t} := \frac{1}{q_{t,i}} \ell(\theta_t; z) \mathbf{e}_i. \quad (i \sim q_t, z \sim P_i)$ |
| Algorithm 3 | OGD                  | Tsallis-INF     | $\hat{\nabla}_{\theta,t} := \nabla_\theta \ell(\theta_t; z), \quad \hat{\nabla}_{q,t} := \frac{1}{q_{t,i}} \ell(\theta_t; z) \mathbf{e}_i. \quad (i \sim q_t, z \sim P_i)$ |
